# Supplementary material
Source: MDPI journal article supplement (https://www.mdpi.com/2071-1050/15/6/5531)
Supplement: s1 [file s1]

# Automation of Life Cycle Assessment—A Critical Review

## Bibliometric Analysis

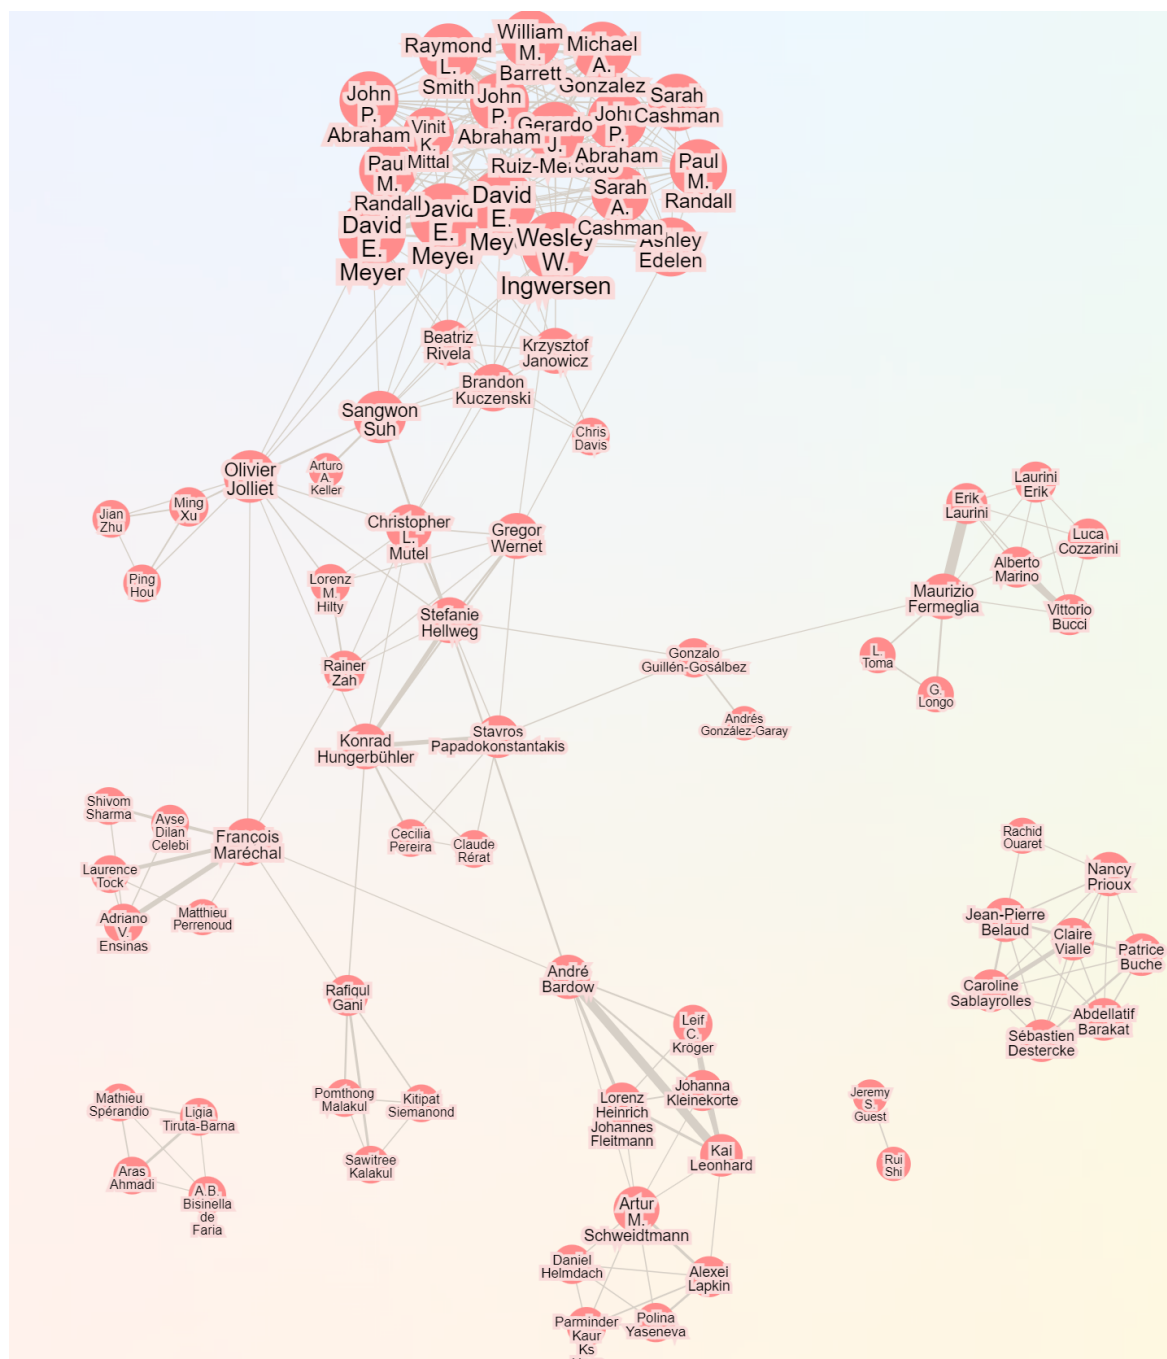

**Figure S1.** Connection between authors in the analysed papers summarized in **Error! Reference source not found.** Only the analysed papers, no further research, was used to build this figure [1].

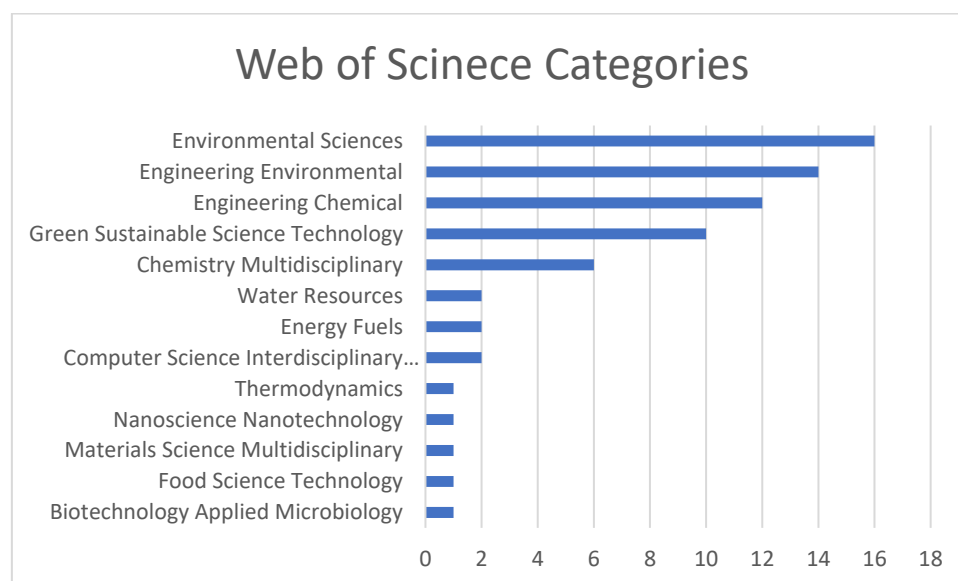

**Figure S2.** Categories of the analysed papers (n=30) by Web of Science.

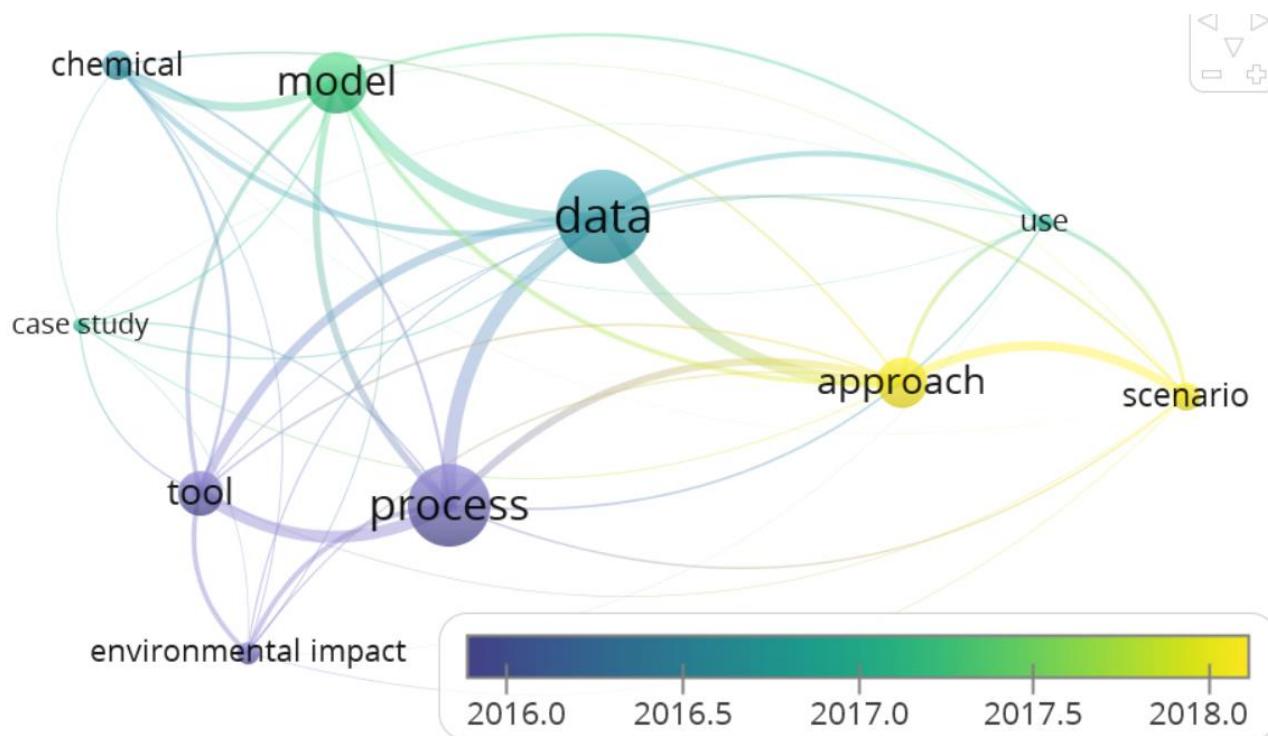

**Figure S3.** Key word analysis of 30 peer-reviewed publications used for the bibliometric and empirical evaluation; Software: VOSviewer version 1.6.18; Settings: Extraction from Title and Abstract; Minimum number of occurrences of a term- 10; Selection rate = Relevance > 0.5 (not selected terms with this condition were: lca, life cycle assessment, framework and study); Size- Weighted after Occurrence; Scores- Average Publication year [2].

### Empirical Analysis

**Table S1.** Web of Science Analysis by Country/Region (Analysed articles see table S3).

| Countries/<br>Regions | Record Count | % of 31 |
|-----------------------|--------------|---------|
| USA                   | 11           | 35.484  |
| SWITZERLAND           | 9            | 29.032  |
| FRANCE                | 6            | 19.355  |

|               |   |        |
|---------------|---|--------|
| GERMANY       | 4 | 12.903 |
| ITALY         | 2 | 6.452  |
| NETHERLANDS   | 2 | 6.452  |
| DENMARK       | 1 | 3.226  |
| ENGLAND       | 1 | 3.226  |
| LUXEMBOURG    | 1 | 3.226  |
| SPAIN         | 1 | 3.226  |
| SWEDEN        | 1 | 3.226  |
| BRAZIL        | 1 | 3.226  |
| THAILAND      | 1 | 3.226  |
| ECUADOR       | 1 | 3.226  |
| MEXICO        | 1 | 3.226  |
| SINGAPORE     | 1 | 3.226  |
| COTE D'IVOIRE | 1 | 3.226  |

**Table S2.** Web of Science Analysis by Authors of the reviewed publications (source in table S3).

| Authors               | Record Count | % of 31 |
|-----------------------|--------------|---------|
| Belaud JP             | 4            | 12.903  |
| Hungerbuhler K        | 4            | 12.903  |
| Ingwersen WW          | 4            | 12.903  |
| Meyer DE              | 4            | 12.903  |
| Papadokonstantakis S  | 4            | 12.903  |
| Barrett WM            | 3            | 9.677   |
| Gonzalez MA           | 3            | 9.677   |
| Sablayrolles C        | 3            | 9.677   |
| Smith RL              | 3            | 9.677   |
| Wernet G              | 3            | 9.677   |
| Abraham JP            | 2            | 6.452   |
| Bardow A              | 2            | 6.452   |
| Fermeglia M           | 2            | 6.452   |
| Hellweg S             | 2            | 6.452   |
| Hou P                 | 2            | 6.452   |
| Kahn E                | 2            | 6.452   |
| Kleinekorte J         | 2            | 6.452   |
| Kuczenski B           | 2            | 6.452   |
| Leonhard K            | 2            | 6.452   |
| Marechal F            | 2            | 6.452   |
| Mittal VK             | 2            | 6.452   |
| Montrejaud-vignoles M | 2            | 6.452   |
| Pereira C             | 2            | 6.452   |
| Vialle C              | 2            | 6.452   |
| Xu M                  | 2            | 6.452   |
| Ahmadi A              | 1            | 3.226   |
| Arbuckle P            | 1            | 3.226   |
| Azzaro-pantel C       | 1            | 3.226   |
| Bailin SC             | 1            | 3.226   |
| Barakat A             | 1            | 3.226   |
| Baudin I              | 1            | 3.226   |
| Benetto E             | 1            | 3.226   |
| Bertagna S            | 1            | 3.226   |
| Bucci V               | 1            | 3.226   |
| Buche P               | 1            | 3.226   |
| Busset G              | 1            | 3.226   |
| Cai JR                | 1            | 3.226   |
| Cashman SA            | 1            | 3.226   |
| Celebi AD             | 1            | 3.226   |
| Cooper J              | 1            | 3.226   |
| Cozzarini L           | 1            | 3.226   |
| Davis CB              | 1            | 3.226   |
| De Faria ABB          | 1            | 3.226   |
| De Koning D           | 1            | 3.226   |
| Destercke S           | 1            | 3.226   |

|                    |   |       |
|--------------------|---|-------|
| Edelen AN          | 1 | 3.226 |
| Ensinas AV         | 1 | 3.226 |
| Fischer U          | 1 | 3.226 |
| Fleitmann L        | 1 | 3.226 |
| Gani R             | 1 | 3.226 |
| Gillani S          | 1 | 3.226 |
| Guest JS           | 1 | 3.226 |
| Hauner I           | 1 | 3.226 |
| Hawkins TR         | 1 | 3.226 |
| Heer PK            | 1 | 3.226 |
| Helmdach D         | 1 | 3.226 |
| Hilty LM           | 1 | 3.226 |
| Ingwersen W        | 1 | 3.226 |
| Janowicz K         | 1 | 3.226 |
| Jolliet O          | 1 | 3.226 |
| Kalakul S          | 1 | 3.226 |
| Keller AA          | 1 | 3.226 |
| Kroger L           | 1 | 3.226 |
| Lapkin AA          | 1 | 3.226 |
| Laurini E          | 1 | 3.226 |
| Le Lann JM         | 1 | 3.226 |
| Longo G            | 1 | 3.226 |
| Malakul P          | 1 | 3.226 |
| Marino A           | 1 | 3.226 |
| Mery Y             | 1 | 3.226 |
| Mio A              | 1 | 3.226 |
| Moore G            | 1 | 3.226 |
| Morales-mendoza LF | 1 | 3.226 |
| Mutel C            | 1 | 3.226 |
| Mutel CL           | 1 | 3.226 |
| Norris GA          | 1 | 3.226 |
| Ouattara A         | 1 | 3.226 |
| Paulsen H          | 1 | 3.226 |
| Perrenoud M        | 1 | 3.226 |
| Prioux N           | 1 | 3.226 |
| Qu S               | 1 | 3.226 |
| Randall PM         | 1 | 3.226 |
| Reinhard J         | 1 | 3.226 |
| Rerat C            | 1 | 3.226 |
| Rivela B           | 1 | 3.226 |
| Ruiz-mercado G     | 1 | 3.226 |
| Ruiz-mercado GJ    | 1 | 3.226 |
| Scanlon K          | 1 | 3.226 |
| Schweidtmann AM    | 1 | 3.226 |
| Sharma S           | 1 | 3.226 |
| Shi R              | 1 | 3.226 |
| Siemanond K        | 1 | 3.226 |
| Song RS            | 1 | 3.226 |
| Sperandio M        | 1 | 3.226 |
| Srocka M           | 1 | 3.226 |
| Steubing B         | 1 | 3.226 |
| Suh S              | 1 | 3.226 |
| Tiruta-bama L      | 1 | 3.226 |
| Tiruta-barna L     | 1 | 3.226 |
| Tock L             | 1 | 3.226 |
| Toma L             | 1 | 3.226 |
| Transue TR         | 1 | 3.226 |
| Yaseneva P         | 1 | 3.226 |
| Zah R              | 1 | 3.226 |
| Zhu J              | 1 | 3.226 |

Table S3. Empirical Analysis of Reviewed Papers.

| Data Source   | Nr. | Literature Source                | Short Description                                           | Examples/Case Studies                                                                                  | Used after publication | Topic               | Code/parameters are freely available | Uncertainty method | Automation Method                  | University/Employer                                                                               | Country First Author               | Journal     | Publisher                                          |                           |
|---------------|-----|----------------------------------|-------------------------------------------------------------|--------------------------------------------------------------------------------------------------------|------------------------|---------------------|--------------------------------------|--------------------|------------------------------------|---------------------------------------------------------------------------------------------------|------------------------------------|-------------|----------------------------------------------------|---------------------------|
| Plant Data    | 1   | Pereira et al. 2013 [3]          | Shortcut Model for Standard Operating Procedure             | Steam consumption of two factories in Switzerland using their standard operating procedures (SOPs) [3] | not found              | chemical production | x                                    | ✓                  | fuzzy intervals                    | standard process documentation, rules of thumb, expert opinion, and thermodynamic principles.     | ETH Zürich                         | Switzerland | Industrial & Engineering Chemistry Research        | American Chemical Society |
|               | 2   | Cashman et al. 2016 [4]          | Data Mining from EPA                                        | case study on acetic acid [4]; extended by Meyer et al. [5] for a case study on cumene manufacturing   | yes [5]                | chemical production | x                                    | ✓                  | Data quality analysis, Monte Carlo | data mining and linked open data                                                                  | Eastern Research Group             | USA         | Environmental Science & Technology                 | American Chemical Society |
| LCA Databases | 3   | Reinhardt et al. 2016 [6]        | LCI database developer's prioritization                     | Ecovinent update [7]                                                                                   | yes                    | general             | x                                    | x                  |                                    | contribution-based prioritization method                                                          | University of Zurich               | Switzerland | The International Journal of Life Cycle Assessment | Springer                  |
|               | 4   | Ingwersen et al. 2015 [8]        | New data architecture                                       | Federal LCA Commons [9]                                                                                | yes [9]                | ✓                   | x                                    |                    | Contribution analysis              | Resource Description Framework - making different database with different data formats relateable | US Environmental Protection Agency | USA         | The International Journal of Life Cycle Assessment | Springer                  |
|               | 5   | Mittal et al. 2018 [10]          | semantic data methodology for automated inventory modelling | nylon-6 production [10]                                                                                | not found              | chemical production | x                                    | x                  |                                    | resource description framework                                                                    | US Environmental Protection Agency | USA         | Sustainable Chemistry & Engineering                | American Chemical Society |
|               | 6   | Steubing and de Koning 2021 [11] | Superstructure for future scenarios in background data      | electric vehicles using future background scenarios for                                                | not found              | general             | upon request                         | x                  |                                    | superstructure process management                                                                 | Leiden University                  | Netherlands | The International Journal of Life Cycle            | Springer                  |

|                       |                        |                                                                              |                                                           |                                                                                                              |                                                                             |                              |              |   |                 |                                                                                                                                       |                                    |             |                                                    |                                          |
|-----------------------|------------------------|------------------------------------------------------------------------------|-----------------------------------------------------------|--------------------------------------------------------------------------------------------------------------|-----------------------------------------------------------------------------|------------------------------|--------------|---|-----------------|---------------------------------------------------------------------------------------------------------------------------------------|------------------------------------|-------------|----------------------------------------------------|------------------------------------------|
|                       | from 2020 to 2050 [11] |                                                                              |                                                           |                                                                                                              |                                                                             |                              |              |   |                 |                                                                                                                                       | Assessment                         |             |                                                    |                                          |
|                       | 7                      | Ingwersen, Kahn, and Cooper 2018; Srocka 2019 [12,13]                        | Bridge processes – autoprox                               | Presented and discussed in Kuczenski et al. [14]; not used in a LCA                                          | not found                                                                   | general                      | upon request | x |                 | Automated Bridge processes creation by a code written in Kotlin, to connect fore- and background data                                 | US Environmental Protection Agency | USA         | The International Journal of Life Cycle Assessment | Springer                                 |
|                       | 8                      | Kuczenski et al. 2016, 2021 [14,15]                                          | Connection from data and different data sources           | Olca: Example for parametrized process [16]                                                                  | not found                                                                   | general                      | ✓            | x |                 | different solutions for connecting data sources using techniques like web scraping, Mock values or classification via metadata search | University of California           | USA         | The International Journal of Life Cycle Assessment | Springer                                 |
| Scientific Literature | 9                      | Belaud et al. 2021; Lousteau-Cazalet et al. 2016; Prioux et al. 2021 [17–20] | Knowledge Engineering (KE) for data extraction            | sugar yield after enzymatic hydrolysis [20]; pretreatment processes of rice straw and corn stover [18,19,21] | original model from 2016 was further developed                              | Biorefinery                  | x            | ✓ | pedigree matrix | KE methods                                                                                                                            | Université de Toulouse             | France      | Waste and Biomass Valorization                     | Springer                                 |
| Process Simulation    | 10                     | Fermegli, Longo, and Toma 2008; 2009 [22,23]                                 | Process Sustainability Prediction Framework for Cape Open | phthalic anhydride from naphthalene [22]; Maleic Anhydride Production Process [23]                           | No, but (Morales - Mendoza et al. [24] refers to it as wanting to extend it | chemical production          | upon request | x |                 | Visual Basic based framework interacting through Cape Open with process simulation software (PROII, Aspen Plus, COCO/COFE ).          | University of Trieste              | Italy       | Environmental and Energy Engineering               | American Institute of Chemical Engineers |
|                       | 11                     | Morales - Mendoza et al. 2018                                                | Ecodesign Framework                                       | benzene production and biodiesel production process from waste                                               | yes [25]                                                                    | Biorefinery, Food production | x            | x |                 | automated coupling framework , the Ecodesign Framework                                                                                | ETH Zurich                         | Switzerland | Energy & Environmental Science                     | Royal Society of Chemistry               |

|    |                                                                          |                                                           |                                                       |                                                                                                |                           |              |   |                                              |  |                                                                                                                                                 |                                          |                 |                                                    |                                             |
|----|--------------------------------------------------------------------------|-----------------------------------------------------------|-------------------------------------------------------|------------------------------------------------------------------------------------------------|---------------------------|--------------|---|----------------------------------------------|--|-------------------------------------------------------------------------------------------------------------------------------------------------|------------------------------------------|-----------------|----------------------------------------------------|---------------------------------------------|
|    |                                                                          |                                                           | vegetable oil [24]; milk evaporation process [25];    |                                                                                                |                           |              |   |                                              |  | k, used with process simulation software COCO, ProSim Plus, and Aspen HYSYS.                                                                    |                                          |                 |                                                    |                                             |
| 12 | S. T. Gillani 2013; S. Gillani et al. 2013 [24,26,27]                    | SimLCA                                                    | Jatropha biodiesel production system [26,27]          | not found                                                                                      | Biorefinery               | x            | ✓ | pedigree matrix                              |  | automated updating of simulation ProSim Plus data in their own developed LCA software                                                           | Laboratoire de Génie Chimique            | France          | CHEMIC AL ENGINE TRANSACTIONS                      | Italian Association of Chemical Engineering |
| 13 | Busset, Belaud, and Montréjaud-Vignoles 2014; Busset et al. 2015 [21,28] | process-product-enterprise (P <sup>2</sup> E) and &cOlive | Olive oil production [28]                             | No, although two of the authors developed SimLCA, so knowledge is probably transferred from it | Food production           | x            | ~ | "uncertainty analysis is partially proposed" |  | developed VBA application converting data directly from process simulation to a product model and for sustainability assessment.                | Université de Toulouse                   | France          | CHEMIC AL ENGINE TRANSACTIONS                      | Italian Association of Chemical Engineering |
| 14 | Celebi et al. 2017 [29]                                                  | thermo-environmental optimization methodology             | Wood to product (sugars and syngas) [29]              | not found                                                                                      | Biorefinery               | upon request | x |                                              |  | data obtained by Aspen Plus and Belsim VALI were combined and used for LCA calculation; the MILP problem was solved by the Lua-OSMOSE framework | Ecole Polytechnique Federale de Lausanne | Switzerland and | Energy                                             | Elsevier                                    |
| 15 | Mery et al. 2013 [30]                                                    | simulation tool for water treatment EVALEAU               | drinking water plant located in the Paris region [30] | used data and EVALEAU software [31]                                                            | water treatment processes | x            | x |                                              |  | data from the water treatment simulation tool EVALEAU and calculations from the                                                                 | Université de Toulouse                   | France          | The International Journal of Life Cycle Assessment | Springer                                    |

|    |                                                  |                                                   |                                                                                                                                                                                                        |             |                                                |   |   |                      |                                                                                                                                                                               |                                 |         |                                          |                  |
|----|--------------------------------------------------|---------------------------------------------------|--------------------------------------------------------------------------------------------------------------------------------------------------------------------------------------------------------|-------------|------------------------------------------------|---|---|----------------------|-------------------------------------------------------------------------------------------------------------------------------------------------------------------------------|---------------------------------|---------|------------------------------------------|------------------|
|    |                                                  |                                                   |                                                                                                                                                                                                        |             |                                                |   |   |                      | water chemistry calculation software PHREEQC were via a python code imported into the LCA Software Umberto.                                                                   |                                 |         |                                          |                  |
| 16 | Bisinellae Faria et al. 2015 [32]                | DM-LCA approach                                   | different treatment options for Urine Source-Separation [32]                                                                                                                                           | not found   | Water treatment processes                      | x | x |                      | coupling the software BioWin through a python script with LCA in Umberto                                                                                                      | Université de Toulouse          | France  | Water Research journal                   | Elsevier         |
| 17 | Gonzalez-Garayzar and Guillen-Gosalbez 2018 [33] | Sustainable Chemical ProcEses (Suscape) Framework | production of methanol from CO <sub>2</sub> and hydrogen [33,34]; production of methanol with H <sub>2</sub> derived from fossil fuels compare it with 10 alternative transportation liquid fuels [34] | yes, [34]   | chemical production                            | x | x |                      | automated connection between Aspen-HYSYS and LCA missing; usage of surrogate modelling, objective reduction, multi-objective optimization and data envelopment analysis (DEA) | Imperial College London         | UK      | Chemical Engineering Research and Design | Elsevier         |
| 18 | Kalakul et al. 2014 [35]                         | LCSoft                                            | bioethanol production process using cassava rhizome [35,36]                                                                                                                                            | yes [36,37] | process desing                                 | x | ✓ | Monte Carlo analysis | LCA Software LCSoft which can interact with other software like one for sustainable design (SustainPro) or economic analysis (ECON)                                           | Technical University of Denmark | Denmark | Journal of Cleaner Production journal    | Elsevier         |
| 19 | Helmdach et al. 2017 [38]                        | Process Optimization with gProms,                 | conversion of terpenes derived from biowaste feed-stocks                                                                                                                                               | not found   | biorenewable-based energy; chemical production | x | x |                      | automated connection between the process simulation                                                                                                                           | University of Cambridge         | UK      | ChemSusChem                              | Chemistry Europe |



|                      |    |                                                     |                                         |                                                                                                                                                                                                                                                                                                                                     |              |                     |   |   |                                                                                                                                 |                                                                                                |                                            |                                              |                                               |                           |
|----------------------|----|-----------------------------------------------------|-----------------------------------------|-------------------------------------------------------------------------------------------------------------------------------------------------------------------------------------------------------------------------------------------------------------------------------------------------------------------------------------|--------------|---------------------|---|---|---------------------------------------------------------------------------------------------------------------------------------|------------------------------------------------------------------------------------------------|--------------------------------------------|----------------------------------------------|-----------------------------------------------|---------------------------|
|                      |    | Matlab and Umberto                                  | into reactive intermediates [38]        |                                                                                                                                                                                                                                                                                                                                     |              |                     |   |   | software gPROMS, the LCA-software Umberto and MATLAB. TS-EMO algorithm for optimization                                         |                                                                                                |                                            |                                              |                                               |                           |
|                      | 20 | Tock, Maréchal, and Perrenoud 2015 [39]             | thermo-environmental model              | ammonia production [39]                                                                                                                                                                                                                                                                                                             | not found    | chemical production | x | x | Integration of LCA as a function in the process simulation software Belsim Vali4, optimization done with evolutionary algorithm | Ecole Polytechnique Federale de Lausanne                                                       | Switzerland                                | The Canadian Journal of Chemical Engineering | The Canadian Society for Chemical Engineering |                           |
|                      | 21 | Shi and Guest 2020; Cortes-Peña et al. 2020 [40,41] | BioSTEAM                                | sugarcane ethanol production [40], co-production of biodiesel and ethanol from lipid-cane and the production of second-generation ethanol from corn stover [41], acetic acid production from lignocellulosic biomass [42], renewable linear alpha-olefins by base-catalyzed dehydration of biologically-derived fatty alcohols [43] | Yes, [42,43] | biorefinery         | ✓ | ✓ | Monte Carlo analysis                                                                                                            | integrated LCA based on Brightway in process simulation software (automation in data transfer) | University of Illinois at Urbana-Champaign | United States                                | Sustainable Chemistry & Engineering           | American Chemical Society |
| Process Calculations | 22 | Kleinekorte et al. 2019 [44]                        | ANN for Molecular & Process Descriptors | CO2- & fossilbased production of methanol                                                                                                                                                                                                                                                                                           | not found    | chemical production | x | x |                                                                                                                                 | artificial neural network                                                                      | RWTH Aachen                                | Germany                                      | Computer Aided Chemical                       | Elsevier                  |

|                                          |                            |                                                                |                                                            |                                                                                                                                                                                               |                                             |                                                      |                                                                       |                                                              |                                              |                                                                              |                                |                                                                                                 |                                                                     |                                              |                                                 |                                                                       |                                      |             |                                                                   |                                                           |
|------------------------------------------|----------------------------|----------------------------------------------------------------|------------------------------------------------------------|-----------------------------------------------------------------------------------------------------------------------------------------------------------------------------------------------|---------------------------------------------|------------------------------------------------------|-----------------------------------------------------------------------|--------------------------------------------------------------|----------------------------------------------|------------------------------------------------------------------------------|--------------------------------|-------------------------------------------------------------------------------------------------|---------------------------------------------------------------------|----------------------------------------------|-------------------------------------------------|-----------------------------------------------------------------------|--------------------------------------|-------------|-------------------------------------------------------------------|-----------------------------------------------------------|
|                                          | and formicacid [44]        |                                                                |                                                            |                                                                                                                                                                                               |                                             |                                                      |                                                                       |                                                              |                                              |                                                                              | Univer<br>sity                 | al<br>Engine<br>ring                                                                            |                                                                     |                                              |                                                 |                                                                       |                                      |             |                                                                   |                                                           |
| Stoichio<br>metry                        | 23                         | Pereira<br>et al.<br>2018<br>[45]                              | Statistical<br>Models<br>Based on<br>Reaction<br>Synthesis | <u>Energy<br/>consumption<br/>via<br/>Classification<br/>tree &amp;<br/>Probability<br/>Density<br/>Function<br/>(PDF) Model</u><br>[45]                                                      | not<br>found                                | <u>chemical<br/>productio<br/>n</u>                  | x                                                                     | ✓                                                            | <u>Monte<br/>Carlo<br/>simulation</u>        | probability<br>density<br>functions<br>(PDF) and<br>classificatio<br>n trees | <u>ETH<br/>Zurich</u>          | <u>Switzerl<br/>and</u>                                                                         | <u>Sutaina<br/>ble<br/>Chemist<br/>ry &amp;<br/>Engine<br/>ring</u> | <u>American<br/>Chemical<br/>Society</u>     |                                                 |                                                                       |                                      |             |                                                                   |                                                           |
|                                          |                            |                                                                |                                                            |                                                                                                                                                                                               |                                             |                                                      |                                                                       |                                                              |                                              |                                                                              |                                |                                                                                                 |                                                                     |                                              |                                                 |                                                                       |                                      |             |                                                                   |                                                           |
| Molecul<br>ar<br>Structur<br>e<br>Models | 24                         | Wernet<br>et al.<br>2009;<br>2008<br>[46,47]                   | FineChem<br>model (R-<br>Package)                          | petrochemica<br>l field (“Fine<br>Chem –<br>Safety and<br>Environment<br>al<br>Technology<br>Group   ETH<br>Zurich” n.d.;<br>[48];<br>yes (see<br>examples<br>)<br>chemical<br>productio<br>n | yes (see<br>examples<br>)                   | chemical<br>productio<br>n                           | ✓                                                                     | ✓                                                            | individual<br>standard<br>deviation          | artificial<br>neural<br>network                                              | ETH<br>Zurich                  | Switzerl<br>and                                                                                 | Green<br>Chemist<br>ry                                              | The Royal<br>Society of<br>Chemistry<br>2009 |                                                 |                                                                       |                                      |             |                                                                   |                                                           |
|                                          |                            |                                                                |                                                            |                                                                                                                                                                                               |                                             |                                                      |                                                                       |                                                              |                                              |                                                                              |                                |                                                                                                 |                                                                     |                                              |                                                 |                                                                       |                                      |             |                                                                   |                                                           |
|                                          |                            |                                                                |                                                            | 25                                                                                                                                                                                            | Song,<br>Keller,<br>and Suh<br>2017<br>[53] | Predictive<br>LCIA-Model<br>for Organic<br>Chemicals | Case studies<br>on acetic<br>anhydride &<br>hexafluoroet<br>hane [53] | not<br>found                                                 | chemical<br>productio<br>n                   | ✓                                                                            | ✓                              | Euclidean<br>distance-<br>based AD<br>measureme<br>nt                                           | artificial<br>neural<br>network                                     | Univer<br>sity of<br>Califor<br>nia          | USA                                             | Environ<br>mental<br>Science<br>and<br>Technol<br>ogy                 | American<br>Chemical<br>Society      |             |                                                                   |                                                           |
|                                          |                            |                                                                |                                                            |                                                                                                                                                                                               |                                             |                                                      | 26                                                                    | Kleinek<br>orte et<br>al. 2020<br>[54]                       | ANN vs.<br>Gaussian<br>Process<br>Regression | yes, but<br>training data<br>reference was<br>not visible<br>[54]            | not<br>found                   | chemical<br>productio<br>n                                                                      | x                                                                   | x                                            |                                                 | artificial<br>neural<br>network,<br>Gaussian<br>Process<br>Regression | RWTH<br>Aache<br>n<br>Univer<br>sity | German<br>y | Confere<br>nce<br>Book                                            | AIChE<br>Annual<br>Meeting<br>2020                        |
|                                          |                            |                                                                |                                                            |                                                                                                                                                                                               |                                             |                                                      |                                                                       |                                                              |                                              | 27                                                                           | Meyer<br>et al.<br>2019<br>[5] | Purpose-<br>Driven<br>Reconciliati<br>on for<br>estimating<br>chemical<br>production<br>release | cumene<br>production [5]                                            | not<br>found                                 | chemical<br>productio<br>n                      | ✓                                                                     | x                                    |             | Classificatio<br>n and<br>Regression<br>Tree,<br>Random<br>Forest | U.S.<br>Environ<br>mental<br>Protec<br>tion<br>Agenc<br>y |
| 28                                       | Hou et<br>al. 2020<br>[55] | machine<br>learning<br>models for<br>estimating<br>ecotoxicity | Estimation of<br>HC50 and<br>CFeco [55]                    | not<br>found                                                                                                                                                                                  | chemical<br>productio<br>n                  | x                                                    | ✓                                                                     | confidence<br>interval and<br>cook’s<br>distance<br>measures | Radom<br>Forest                              |                                                                              |                                |                                                                                                 | Univer<br>sity of<br>Michig<br>an                                   | USA                                          | Environ<br>ment<br>Internat<br>ional<br>journal | Elsevier                                                              |                                      |             |                                                                   |                                                           |

|       | characterization factors |                                                          |                                                                                                    |           |                          |   |   |                                          |                                         |                        |       |                                        |
|-------|--------------------------|----------------------------------------------------------|----------------------------------------------------------------------------------------------------|-----------|--------------------------|---|---|------------------------------------------|-----------------------------------------|------------------------|-------|----------------------------------------|
|       | Mio et al. 2021 [56]     | Multiscale modelling techniques in life cycle assessment | nano-engineered thermoplastic polymers Mio et al. 2021                                             | not found | nano material production | x | x |                                          | lack on details                         | University of Trieste  | Italy | Sustainable Materials and Technologies |
| Proxy | 30                       | Hou et al. 2018, Xu et al. 2021 [57,58]                  | on the UPR dataset in theecoinvent 3.1 default model (Hou et al. 2018 [55]), (Xu et al. 2021 [58]) | not found | general                  | ✓ | ✓ | confidence intervals using bootstrapping | similarity-based link prediction method | University of Michigan | USA   | Environmental Science and Technology   |

## References

- Research Rabbit Research Rabbit Analysis of Literature in Review Paper Available online: <https://www.researchrabbitapp.com/collection/public/PJLNY7PP6N> (accessed on 8 June 2022).
- Centre for Science and Technology Studies VOSviewer—Visualizing Scientific Landscapes Available online: <https://www.vosviewer.com/> (accessed on 23 May 2022).
- Pereira, C.; Papadokonstantakis, S.; Rérat, C.; Hungerbühler, K. Industrial Documentation-Based Approach for Modeling the Process Steam Consumption in Chemical Batch Plants. *Ind Eng Chem Res* **2013**, *52*, 15635–15647, doi:10.1021/IE401198W.
- Cashman, S.A.; Meyer, D.E.; Edelen, A.N.; Ingwersen, W.W.; Abraham, J.P.; Barrett, W.M.; Gonzalez, M.A.; Randall, P.M.; Ruiz-Mercado, G.; Smith, R.L. Mining Available Data from the United States Environmental Protection Agency to Support Rapid Life Cycle Inventory Modeling of Chemical Manufacturing. **2016**, doi:10.1021/acs.est.6b02160.
- Meyer, D.E.; Mittal, V.K.; Ingwersen, W.W.; Ruiz-Mercado, G.J.; Barrett, W.M.; Gonzalez, M.A.; Abraham, J.P.; Smith, R.L. Purpose-Driven Reconciliation of Approaches to Estimate Chemical Releases. *ACS Sustain Chem Eng* **2019**, *7*, 1260–1270, doi:10.1021/acssuschemeng.8b04923.
- Reinhard, J.; Mutel, C.L.; Wernet, G.; Zah, R.; Hilty, L.M. Contribution-Based Prioritization of LCI Database Improvements: Method Design, Demonstration, and Evaluation. *Environmental Modelling & Software* **2016**, *86*, 204–218, doi:10.1016/J.ENVSOFT.2016.09.018.
- Steubing, B.; Wernet, G.; Reinhard, J.; Bauer, C.; Moreno-Ruiz, E. The Ecoinvent Database Version 3 (Part II): Analyzing LCA Results and Comparison to Version 2. *International Journal of Life Cycle Assessment* **2016**, *21*, 1269–1281, doi:10.1007/S11367-016-1109-6/FIGURES/8.
- Ingwersen, W.W.; Hawkins, T.R.; Transue, T.R.; Meyer, D.E.; Moore, G.; Kahn, E.; Arbuckle, P.; Paulsen, H.; Norris, G.A. A New Data Architecture for Advancing Life Cycle Assessment. *International Journal of Life Cycle Assessment* **2015**, *20*, 520–526, doi:10.1007/S11367-015-0850-6/FIGURES/2.
- Edelen, A.; Hottle, T.; Cashman, S.; Ingwersen, W.W. *The Federal LCA Commons Elementary Flow List: Background, Approach, Description and Recommendations for Use*; 2019;
- Mittal, V.K.; Bailin, S.C.; Gonzalez, M.A.; Meyer, D.E.; Barrett, W.M.; Smith, R.L. Toward Automated Inventory Modeling in Life Cycle Assessment: The Utility of Semantic Data Modeling to Predict Real-World Chemical Production. *ACS Sustain Chem Eng* **2018**, *6*, 1961–1976, doi:10.1021/acssuschemeng.7b03379.
- Steubing, B.; de Koning, D. Making the Use of Scenarios in LCA Easier: The Superstructure Approach. *International Journal of Life Cycle Assessment* **2021**, *26*, 2248–2262, doi:10.1007/S11367-021-01974-2/FIGURES/7.
- Ingwersen, W.W.; Kahn, E.; Cooper, J. Bridge Processes: A Solution for LCI Datasets Independent of Background Databases. *International Journal of Life Cycle Assessment* **2018**, *23*, 2266–2270, doi:10.1007/S11367-018-1448-6/FIGURES/2.
- Srocka, M. GitHub - Msrocka/Autoprox: Generates Bridge Processes in OpenLCA Available online: <https://github.com/msrocka/autoprox> (accessed on 10 January 2022).
- Kuczenski, B.; Mutel, C.; Srocka, M.; Michael, S.; Scanlon, J.; Kelly, J.; Ingwersen, W. LCI METHODOLOGY AND DATABASES Prototypes for Automating Product System Model Assembly. *Int J Life Cycle Assess* **2021**, *1*, 483–496, doi:10.1007/s11367-021-01870-9.
- Kuczenski, B.; Davis, C.B.; Rivela, B.; Janowicz, K. Semantic Catalogs for Life Cycle Assessment Data. *J Clean Prod* **2016**, *137*, 1109–1117, doi:10.1016/J.JCLEPRO.2016.07.216.
- Rickert, J. Olca-Ipc-API-Tutorials/#Example-Parametrized-Process.Ipynb at Main · Julianr/Olca-Ipc-API-Tutorials · GitHub Available online: <https://github.com/julianr/olca-ipc-api-tutorials/blob/main/%23Example-parametrized-process.ipynb> (accessed on 13 January 2022).

17. Belaud, J.-P.; Prioux, N.; Vialle, C.; Buche, P.; Destercke, S.; Barakat, A.; Sablayrolles, C.; Barakat, A. Intensive Data and Knowledge-Driven Approach for Sustainability Analysis: Application to Lignocellulosic Waste Valorization Processes. *Waste and Biomass Valorization* **2021**, *13*, 583–598, doi:10.1007/S12649-021-01509-8.
18. Prioux, N.; Belaud, J.; Hétreux, G. Intensive Data and Knowledge-based Approach for Sustainable and Circular Industrial Systems. *INSIGHT* **2021**, *24*, 43–46, doi:10.1002/INST.12363.
19. Prioux, N.; Belaud, J.P.; Ouaret, R.; Hétreux, G. Data and Environment Based Approach for Process Systems Engineering. *Computer Aided Chemical Engineering* **2021**, *50*, 999–1004, doi:10.1016/B978-0-323-88506-5.50154-6.
20. Lousteau-Cazalet, C.; Barakat, A.; Belaud, J.P.; Buche, P.; Busset, G.; Charnomordic, B.; Dervaux, S.; Destercke, S.; Dibie, J.; Sablayrolles, C.; et al. A Decision Support System Using Multi-Source Scientific Data, an Ontological Approach and Soft Computing - Application to Eco-Efficient Biorefinery. *2016 IEEE International Conference on Fuzzy Systems, FUZZ-IEEE 2016* **2016**, 249–256, doi:10.1109/FUZZ-IEEE.2016.7737694.
21. Busset, G.; Belaud, J.; Montréjaud-Vignoles, M. Integrated Approach for Agro-Process Design Guided by Sustainability Evaluation: Application to the Olive Oli Production. *5th International Conference on Engineering for Waste and Biomass Valorisation* **2014**.
22. Fermeglia, M.; Longo, G.; Toma, L. COWAR: A CAPE OPEN Software Module for the Evaluation of Process Sustainability. *Environmental Progress* **2008**, *27*, 373–382, doi:10.1002/EP.10262.
23. Fermeglia, M.; Longo, G.; Toma, L. Computer Aided Design for Sustainable Industrial Processes: Specific Tools and Applications. *AIChE Journal* **2009**, *55*, 1065–1078, doi:10.1002/AIC.11730.
24. Morales-Mendoza, L.F.; Azzaro-Pantel, C.; Belaud, J.-P.; Ouattara, A. Coupling Life Cycle Assessment with Process Simulation for Ecodesign of Chemical Processes. *Environ Prog Sustain Energy* **2018**, *37*, 777–796, doi:10.1002/EP.12723.
25. Azzaro-Pantel, C.; Madoumier, M.; Gésan-Guizieu, G. Development of an Ecodesign Framework for Food Manufacturing Including Process Flowsheeting and Multiple-Criteria Decision-Making: Application to Milk Evaporation. *Food and Bioprocess Processing* **2022**, *131*, 40–59, doi:10.1016/J.FBP.2021.10.003.
26. Gillani, S.T. A Life Cycle Assessment and Process System Engineering Integrated Approach for Sustainability: Application to Environmental Evaluation of Biofuel Production. *PHD-Thesis, Institute National Polytechnique de Toulouse* **2013**, 275.
27. Gillani, S.; Belaud, J.-P.; Sablayrolles, C.; Montrejaud-Vignoles, M.; le Lann, J.-M. A CAPE Based Life Cycle Assessment for Evaluating the Environmental Performance of Non-Food Agro-Processes. **2013**, *32*, doi:10.3303/CET1332036.
28. Busset, G.; Sablayrolles, C.; Montréjaud-Vignoles, M.; Vialle, C.; Belaud, J.P. Computer Aided Process Engineering for Sustainability Analysis of Food Production. *Chem Eng Trans* **2015**, *43*, 6, doi:10.3303/CET1543224.
29. Celebi, A.D.; Ensinas, A.V.; Sharma, S.; Maréchal, F. Early-Stage Decision Making Approach for the Selection of Optimally Integrated Biorefinery Processes. *Energy* **2017**, *137*, 908–916, doi:10.1016/J.ENERGY.2017.03.080.
30. Mery, Y.; Tiruta-Barna, L.; Benetto, E.; Baudin, I. An Integrated “Process Modelling-Life Cycle Assessment” Tool for the Assessment and Design of Water Treatment Processes. *International Journal of Life Cycle Assessment* **2013**, *18*, 1062–1070, doi:10.1007/S11367-012-0541-5/FIGURES/5.
31. Capitanescu, F.; Rege, S.; Marvuglia, A.; Benetto, E.; Ahmadi, A.; Gutiérrez, T.N.; Tiruta-Barna, L. Cost versus Life Cycle Assessment-Based Environmental Impact Optimization of Drinking Water Production Plants. *J Environ Manage* **2016**, *177*, 278–287, doi:10.1016/J.JENVMAN.2016.04.027.
32. Bisinella de Faria, A.B.; Spérandio, M.; Ahmadi, A.; Tiruta-Barna, L. Evaluation of New Alternatives in Wastewater Treatment Plants Based on Dynamic Modelling and Life Cycle Assessment (DM-LCA). *Water Res* **2015**, *84*, 99–111, doi:10.1016/J.WATRES.2015.06.048.
33. Gonzalez-Garay, A.; Guillen-Gosalbez, G. SUSCAPE: A Framework for the Optimal Design of SUSTainable ChemiCAI ProcEsses Incorporating Data Envelopment Analysis. *Chemical Engineering Research and Design* **2018**, *137*, 246–264, doi:10.1016/j.cherd.2018.07.009.
34. Rodríguez-Vallejo, D.F.; Galán-Martín, Á.; Guillén-Gosálbez, G.; Chachuat, B. Data Envelopment Analysis Approach to Targeting in Sustainable Chemical Process Design: Application to Liquid Fuels. *AIChE Journal* **2019**, *65*, e16480, doi:10.1002/AIC.16480.
35. Kalakul, S.; Malakul, P.; Siemanond, K.; Gani, R. Integration of Life Cycle Assessment Software with Tools for Economic and Sustainability Analyses and Process Simulation for Sustainable Process Design. *J Clean Prod* **2014**, *71*, 98–109, doi:10.1016/J.JCLEPRO.2014.01.022.
36. Petchkaewkul, K.; Malakul, P.; Gani, R. Systematic, Efficient and Consistent LCA Calculations for Chemical and Biochemical Processes. *Computer Aided Chemical Engineering* **2016**, *38*, 1249–1254, doi:10.1016/B978-0-444-63428-3.50213-7.
37. Chavewanmas, Y.; Malakul, P.; Gani, R. LCSoft – the Life Cycle Assessment Software: New Developments and Status. *Computer Aided Chemical Engineering* **2017**, *40*, 2305–2310, doi:10.1016/B978-0-444-63965-3.50386-X.
38. Helmdach, D.; Yaseneva, P.; Heer, P.K.; Schweidtmann, A.M.; Lapkin, A.A. A Multiobjective Optimization Including Results of Life Cycle Assessment in Developing Biorenewables-Based Processes. *ChemSusChem* **2017**, *10*, 3632–3643, doi:10.1002/CSSC.201700927.
39. Tock, L.; Maréchal, F.; Perrenoud, M. Thermo-Environomic Evaluation of the Ammonia Production. *Can J Chem Eng* **2015**, *93*, 356–362, doi:10.1002/CJCE.22126.
40. Shi, R.; Guest, J.S. BioSTEAM-LCA: An Integrated Modeling Framework for Agile Life Cycle Assessment of Biorefineries under Uncertainty. *ACS Sustain Chem Eng* **2020**, *8*, 18903–18914, doi:10.1021/acssuschemeng.0c05998.

41. Cortes-Peña, Y.; Kumar, D.; Singh, V.; Guest, J.S. BioSTEAM: A Fast and Flexible Platform for the Design, Simulation, and Techno-Economic Analysis of Biorefineries under Uncertainty. *ACS Sustain Chem Eng* **2020**, *8*, 3302–3310, doi:10.1021/ACSSUSCHEMENG.9B07040/SUPPL\_FILE/SC9B07040\_SI\_001.PDF.
42. Li, Y.; Bhagwat, S.S.; Cortés-Peña, Y.R.; Ki, D.; Rao, C. V.; Jin, Y.S.; Guest, J.S. Sustainable Lactic Acid Production from Lignocellulosic Biomass. *ACS Sustain Chem Eng* **2021**, *9*, 1341–1351, doi:10.1021/ACSSUSCHEMENG.0C08055/SUPPL\_FILE/SC0C08055\_SI\_001.PDF.
43. McClelland, D.J.; Wang, B.X.; Cordell, W.T.; Cortes-Peña, Y.R.; Gilcher, E.B.; Zhang, L.; Guest, J.S.; Pfleger, B.F.; Huber, G.W.; Dumesic, J.A. Renewable Linear Alpha-Olefins by Base-Catalyzed Dehydration of Biologically-Derived Fatty Alcohols. *Green Chemistry* **2021**, *23*, 4338–4354, doi:10.1039/D1GC00243K.
44. Kleinekorte, J.; Kröger, L.; Leonhard, K.; Bardow, A. A Neural Network-Based Framework to Predict Process-Specific Environmental Impacts. *Computer Aided Chemical Engineering* **2019**, *46*, 1447–1452, doi:10.1016/B978-0-12-818634-3.50242-3.
45. Pereira, C.; Hauner, I.; Hungerbühler, K.; Papadokonstantakis, S. Gate-to-Gate Energy Consumption in Chemical Batch Plants: Statistical Models Based on Reaction Synthesis Type. *ACS Sustain Chem Eng* **2018**, *6*, 5784–5796, doi:10.1021/acssuschemeng.7b03769.
46. Wernet, G.; Hellweg, S.; Fischer, U.; Papadokonstantakis, S.; Hungerbühler, K. Molecular-Structure-Based Models of Chemical Inventories Using Neural Networks. *Environ Sci Technol* **2008**, *42*, 6717–6722, doi:10.1021/ES7022362.
47. Wernet, G.; Papadokonstantakis, S.; Hellweg, S.; Hungerbühler, K. Bridging Data Gaps in Environmental Assessments: Modeling Impacts of Fine and Basic Chemical Production. *Green Chemistry* **2009**, *11*, 1826–1831, doi:10.1039/B905558D.
48. Papadokonstantakis, S.; Baxevanidis, P.; Marcoulaki, E.; Badr, S.; Kokossis, A. Shortcut Models Based on Molecular Structure for Life Cycle Impact Assessment: The Case of the FineChem Tool and Beyond. *Handbook of Green Chemistry* **2018**, *10*, 29–48, doi:10.1002/9783527628698.hgc114.
49. Papadopoulos, A.I.; Badr, S.; Chremos, A.; Forte, E.; Zarogiannis, T.; Seferlis, P.; Papadokonstantakis, S.; Adjiman, C.S.; Galindo, A.; Jackson, G. Efficient Screening and Selection of Post-Combustion CO<sub>2</sub> Capture Solvents. **2014**, *39*, doi:10.3303/CET1439036.
50. Morales, M.; Dapsens, P.Y.; Giovinazzo, I.; Witte, J.; Mondelli, C.; Papadokonstantakis, S.; Hungerbühler, K.; Pérez-Ramírez, J. Environmental and Economic Assessment of Lactic Acid Production from Glycerol Using Cascade Bio- and Chemocatalysis. *Energy Environ Sci* **2015**, *8*, 558–567, doi:10.1039/C4EE03352C.
51. Morales, M.; Ataman, M.; Badr, S.; Linster, S.; Kourlimpinis, I.; Papadokonstantakis, S.; Hatzimanikatis, V.; Hungerbühler, K. Sustainability Assessment of Succinic Acid Production Technologies from Biomass Using Metabolic Engineering. *Energy Environ Sci* **2016**, *9*, 2794–2805, doi:10.1039/C6EE00634E.
52. Wernet, G.; Hellweg, S.; Hungerbühler, K. A Tiered Approach to Estimate Inventory Data and Impacts of Chemical Products and Mixtures. *International Journal of Life Cycle Assessment* **2012**, *17*, 720–728, doi:10.1007/S11367-012-0404-0/TABLES/2.
53. Song, R.; Keller, A.A.; Suh, S. Rapid Life-Cycle Impact Screening Using Artificial Neural Networks. *Environ Sci Technol* **2017**, *51*, 10777–10785, doi:10.1021/acs.est.7b02862.
54. Kleinekorte, J.; Beckert, V.; Fleitmann, L.; Johannes, Heinrich Kröger, L.C.; Leonhard, K.; Bardow, A. Predictive Life Cycle Assessment with Limited Training Data: Artificial Neural Networks Vs. Gaussian Process Regression | AIChE Academy. In *Conference Book - 2020 Virtual AIChE Annual Meeting proceedings*; 2020.
55. Hou, P.; Jolliet, O.; Zhu, J.; Xu, M. Estimate Ecotoxicity Characterization Factors for Chemicals in Life Cycle Assessment Using Machine Learning Models. *Environ Int* **2020**, *135*, 105393, doi:10.1016/J.ENVINT.2019.105393.
56. Mio, A.; Bertagna, S.; Cozzarini, L.; Laurini, E.; Bucci, V.; Marinò, A.; Fermeglia, M. Multiscale Modelling Techniques in Life Cycle Assessment: Application to Nanostructured Polymer Systems in the Maritime Industry. *Sustainable Materials and Technologies* **2021**, *29*, e00327, doi:10.1016/J.SUSMAT.2021.E00327.
57. Hou, P.; Cai, J.; Qu, S.; Xu, M. Estimating Missing Unit Process Data in Life Cycle Assessment Using a Similarity-Based Approach. *Environ Sci Technol* **2018**, *52*, 5259–5267, doi:10.1021/ACS.EST.7B05366/SUPPL\_FILE/ES7B05366\_SI\_002.XLSX.
58. Xu, M.; Zhao, B.; Shuai, C.; Hou, P.; Qu, S. Estimation of Unit Process Data for Life Cycle Assessment Using a Decision Tree-Based Approach. *Environ Sci Technol* **2021**, *55*, 8439–8446, doi:10.1021/ACS.EST.0C07484/SUPPL\_FILE/ES0C07484\_SI\_001.XLSX.

**Disclaimer/Publisher's Note:** The statements, opinions and data contained in all publications are solely those of the individual author(s) and contributor(s) and not of MDPI and/or the editor(s). MDPI and/or the editor(s) disclaim responsibility for any injury to people or property resulting from any ideas, methods, instructions or products referred to in the content.
